# Supplementary material for: Novel Predictors of Breast Cancer Survival Derived from miRNA Activity Analysis
Source: Oxford University Press journal article supplement (doi:10.1158/1078-0432.ccr-17-0996), 2017-11-14
Supplement: 10780432ccr170996-sup-181256_3_supp_4352015_yydzs5.xlsx [file 10780432ccr170996-sup-181256_3_supp_4352015_yydzs5.xlsx]

## Sheet: rez_ERPR_all
		ERPR_all							ERPR_pos							ERPR_neg							ERPR_adj							ROR_adj							ROR_high							ROR_low+med
Gene	PAM50	HR	HR.CI	p	p.BH	q	N.hi		HR	HR.CI	p	p.BH	q	N.hi		HR	HR.CI	p	p.BH	q	N.hi		HR	HR.CI	p	p.BH	q	N.hi		HR	HR.CI	p	p.BH	q	N.hi		HR	HR.CI	p	p.BH	q	N.hi		HR	HR.CI	p	p.BH	q	N.hi
SUSD3		0.31	0.2 - 0.4	5.17267e-10	4.56476e-08	2	486		0.34	0.2 - 0.5	4.3729e-06	7.77405e-05	2	389		0.36	0.2 - 0.7	0.00151223	0.0806525	2	96		0.37	0.2 - 0.6	1.379e-05	0.000473205	3	424		0.44	0.3 - 0.7	4.99998e-05	0.00172499	2	486		0.61	0.4 - 1.0	0.0292287	0.100582	5	125		0.26	0.1 - 0.5	4.30527e-05	0.00297063	2	285
BIRC5	1	3.3	2.3 - 4.8	5.70595e-10	4.56476e-08	6	243		3.6	2.3 - 5.6	2.89028e-08	4.62445e-06	7	146		2.1	1.1 - 4.0	0.0297322	0.195985	7	36		2.9	1.9 - 4.2	1.84256e-07	2.94809e-05	6	243
CEP55	1	2.9	2.0 - 4.1	1.62829e-08	8.68422e-07	7	189		3	1.9 - 4.7	2.08152e-06	5.55071e-05	8	107		1.9	1.0 - 3.6	0.0557477	0.249943	5	60		2.4	1.6 - 3.6	6.15642e-06	0.000328342	7	189
ARMCX1		0.35	0.2 - 0.5	5.17629e-08	1.68747e-06	2	485		0.41	0.3 - 0.6	0.000151287	0.00110027	2	389		0.55	0.3 - 1.0	0.0632288	0.249943	5	60		0.45	0.3 - 0.7	0.000133142	0.00142019	2	485		0.54	0.4 - 0.8	0.00236258	0.0212437	2	485		0.63	0.4 - 1.0	0.036089	0.105963	4	149		0.43	0.2 - 0.8	0.0135687	0.180219	2	285
ORC6	1	3.1	2.0 - 4.6	5.6811e-08	1.68747e-06	9	100		2.2	1.4 - 3.6	0.000574801	0.00317132	8	115		2.2	1.1 - 4.1	0.02083	0.195985	7	36		2.4	1.5 - 3.7	8.76651e-05	0.00100189	9	100
CENPF	1	2.7	1.9 - 3.9	6.328e-08	1.68747e-06	7	182		3.1	1.9 - 4.8	1.98572e-06	5.55071e-05	9	87		1.5	0.8 - 2.9	0.205498	0.36028	5	60		2.3	1.6 - 3.4	1.55894e-05	0.000473205	7	182
CROT		0.3	0.2 - 0.5	8.75178e-08	2.00041e-06	5	271		0.36	0.2 - 0.6	5.27431e-06	8.43889e-05	2	333		1.5	0.7 - 2.8	0.269514	0.379376	3	65		0.35	0.2 - 0.6	5.47978e-06	0.000328342	5	271		0.38	0.2 - 0.6	2.49555e-05	0.00149254	5	271		0.29	0.1 - 0.6	0.00112233	0.0221259	8	57		0.41	0.2 - 0.8	0.00562398	0.129352	2	238
TPX2		2.7	1.8 - 3.9	1.76196e-07	3.52393e-06	7	211		3.1	2.0 - 4.9	1.09034e-06	5.55071e-05	7	166		1.4	0.6 - 3.3	0.392539	0.44389	2	96		2.2	1.5 - 3.3	4.38412e-05	0.00063769	7	211		1.3	0.8 - 2.1	0.286252	0.323793	7	211		1.2	0.8 - 1.9	0.36356	0.405719	4	149		1.6	0.8 - 3.0	0.179738	0.297025	7	113
MELK	1	2.8	1.9 - 4.1	2.39591e-07	4.2594e-06	6	266		2.9	1.8 - 4.5	4.33004e-06	7.77405e-05	7	166		1.6	0.7 - 3.8	0.271069	0.379376	2	96		2.3	1.5 - 3.5	4.90082e-05	0.000653443	6	266
KIF2C	1	2.8	1.9 - 4.2	4.12156e-07	6.0835e-06	5	303		3.1	2.0 - 5.0	1.5002e-06	5.55071e-05	6	195		1.7	0.8 - 3.5	0.134693	0.314867	7	36		2.4	1.5 - 3.6	6.44075e-05	0.000792708	5	303
TYMS	1	2.6	1.8 - 3.8	4.48938e-07	6.0835e-06	6	242		2.6	1.7 - 4.2	3.54341e-05	0.00031497	6	195		1.6	0.8 - 3.2	0.216018	0.365786	4	72		2.3	1.6 - 3.4	1.77452e-05	0.000473205	6	242
TMBIM4		0.38	0.3 - 0.6	4.56263e-07	6.0835e-06	4	364		0.44	0.3 - 0.7	0.000324271	0.00207533	3	340		0.72	0.3 - 1.6	0.43871	0.471098	8	24		0.47	0.3 - 0.7	0.000295306	0.00277936	4	364		0.59	0.4 - 0.9	0.012792	0.0517823	4	364		0.65	0.4 - 1.1	0.0975228	0.191599	7	75		0.49	0.2 - 1.0	0.0388606	0.191628	2	285
KIF18B		2.8	1.9 - 4.2	6.46539e-07	7.9574e-06	4	308		2.7	1.7 - 4.2	1.57693e-05	0.000194083	7	134		2.7	0.6 - 11.2	0.180377	0.351956	1	106		2.4	1.6 - 3.7	3.6176e-05	0.000604386	4	308		1.6	1.0 - 2.6	0.0628514	0.116548	4	308		2.1	1.1 - 4.0	0.031329	0.100582	2	199		1.8	0.9 - 3.4	0.0820677	0.220249	6	102
AR		0.39	0.3 - 0.6	1.33091e-06	1.52104e-05	2	485		0.36	0.2 - 0.6	1.48818e-05	0.000194083	4	292		1.6	0.8 - 3.3	0.166351	0.336913	8	24		0.28	0.2 - 0.5	3.77741e-05	0.000604386	7	182		0.31	0.2 - 0.6	0.000139981	0.00386347	7	182		0.44	0.2 - 0.9	0.0193718	0.100582	8	50		0.37	0.2 - 0.8	0.0116027	0.177908	6	143
ESR1	1	0.39	0.3 - 0.6	2.29763e-06	2.45081e-05	2	485		0.72	0.4 - 1.2	0.220321	0.271164	2	389		1.4	0.7 - 2.6	0.362131	0.426036	6	48		0.66	0.4 - 1.1	0.0838273	0.144219	5	303
UBE2T	1	2.5	1.7 - 3.7	2.94382e-06	2.94382e-05	9	109		2.7	1.7 - 4.3	3.06635e-05	0.000288598	9	85		2	1.0 - 3.8	0.0433148	0.22356	7	36		2.1	1.4 - 3.2	0.000173573	0.00173573	9	109
CENPA		2.3	1.6 - 3.4	7.92515e-06	7.45897e-05	6	237		2.4	1.5 - 3.7	0.000134745	0.00102662	7	146		1.3	0.7 - 2.5	0.471467	0.489836	4	72		1.9	1.3 - 2.8	0.00109019	0.00792869	6	237		0.67	0.4 - 1.1	0.126255	0.179135	4	332		1.3	0.8 - 2.1	0.227178	0.319904	4	149		0.67	0.3 - 1.4	0.277764	0.368571	6	116
UBE2C	1	2.3	1.6 - 3.3	8.61993e-06	7.66216e-05	6	242		3.2	2.1 - 5.0	3.01336e-07	2.41069e-05	7	146		1.4	0.7 - 2.6	0.360929	0.426036	4	72		2.2	1.5 - 3.1	3.15384e-05	0.000604386	6	242
B4GAT1		0.44	0.3 - 0.6	1.36607e-05	0.000115037	4	365		0.57	0.4 - 0.9	0.0188097	0.0495078	5	243		0.43	0.2 - 1.0	0.0377093	0.201116	7	36		0.56	0.4 - 0.8	0.0060712	0.0255629	4	365		0.67	0.5 - 1.0	0.047351	0.0990066	4	365		0.69	0.4 - 1.1	0.146251	0.246129	7	75		0.57	0.3 - 1.1	0.105648	0.24299	2	285
PTGR1		0.46	0.3 - 0.7	3.37454e-05	0.000269963	4	364		0.44	0.3 - 0.7	0.000490836	0.00280478	2	389		1.4	0.7 - 2.8	0.412279	0.44967	3	84		0.56	0.4 - 0.8	0.00487583	0.0222895	5	303		0.7	0.5 - 1.1	0.0976741	0.164378	5	303		0.76	0.5 - 1.2	0.271678	0.348719	7	75		0.44	0.2 - 0.9	0.0189233	0.190431	5	179
CHEK1		2.2	1.5 - 3.2	3.85398e-05	0.000293636	8	139		2.3	1.4 - 3.9	0.00095989	0.00479945	9	71		1.7	0.8 - 3.5	0.146106	0.324681	8	24		1.7	1.1 - 2.5	0.0177027	0.0555379	8	139		0.62	0.4 - 1.0	0.0310586	0.0719586	2	417		1.4	0.9 - 2.2	0.142296	0.24546	5	125		0.53	0.3 - 1.1	0.0692743	0.220249	4	165
FAM83D		2.2	1.5 - 3.2	4.05756e-05	0.000295096	5	267		2.5	1.6 - 3.9	6.95534e-05	0.000556427	6	170		1.5	0.8 - 2.9	0.195255	0.35909	6	53		1.8	1.2 - 2.7	0.00339712	0.0187428	5	267		0.73	0.4 - 1.2	0.205891	0.253688	2	400		0.86	0.5 - 1.4	0.555741	0.564834	7	75		1.8	0.9 - 3.6	0.0762533	0.220249	7	85
CCNB1	1	2.1	1.5 - 3.1	4.29418e-05	0.000296757	6	243		2.7	1.7 - 4.2	2.17993e-05	0.000232526	8	98		0.69	0.3 - 1.5	0.348369	0.426036	7	36		1.9	1.3 - 2.7	0.000801638	0.00610772	6	243
INPP5J		0.47	0.3 - 0.7	4.45135e-05	0.000296757	3	424		0.77	0.5 - 1.2	0.248083	0.298445	4	292		0.61	0.3 - 1.2	0.135218	0.314867	2	87		0.66	0.4 - 1.0	0.0631495	0.121734	3	424		0.66	0.4 - 1.0	0.0312225	0.0719586	3	424		0.67	0.4 - 1.1	0.0933045	0.191599	4	149		0.47	0.2 - 0.9	0.0269153	0.190431	2	285
AURKA		2.1	1.5 - 3.0	5.17977e-05	0.000331505	6	243		2	1.2 - 3.2	0.00557786	0.0194013	8	98		2.1	1.1 - 3.9	0.0251038	0.195985	5	60		2	1.4 - 2.8	0.000344338	0.00306078	6	243		1.6	1.1 - 2.3	0.0132045	0.0517823	6	243		1.7	1.1 - 2.7	0.0133963	0.0803778	6	100		1.6	0.8 - 3.1	0.148946	0.277337	7	107
TXNRD1		2.1	1.5 - 3.0	5.46454e-05	0.00033628	7	182		2.3	1.4 - 3.7	0.000488693	0.00280478	8	98		2	1.1 - 3.7	0.0323238	0.198916	7	36		1.9	1.3 - 2.7	0.000630714	0.00504571	7	182		2	1.4 - 2.9	0.000507027	0.00999568	8	122		2.7	1.7 - 4.2	8.4683e-06	0.000584313	7	75		1.6	0.8 - 3.0	0.176839	0.297025	5	180
CCNA2		2.1	1.5 - 3.1	6.47934e-05	0.000383961	8	162		2.8	1.7 - 4.4	2.03852e-05	0.000232526	9	85		1.3	0.7 - 2.5	0.401291	0.448997	7	36		1.8	1.2 - 2.7	0.00653356	0.0261342	9	108		0.69	0.4 - 1.2	0.169018	0.220042	2	485		1.7	1.0 - 2.8	0.0464149	0.128105	8	50		0.65	0.3 - 1.2	0.197209	0.313952	3	237
SERPINA3		0.46	0.3 - 0.7	7.3461e-05	0.000419777	2	485		0.33	0.1 - 0.8	0.00960702	0.0312006	8	100		0.72	0.3 - 1.5	0.361776	0.426036	2	96		0.43	0.2 - 0.8	0.0126664	0.0422213	8	122		0.43	0.2 - 0.8	0.0107447	0.0499328	8	122		0.71	0.5 - 1.1	0.14444	0.246084	3	174		0.37	0.2 - 0.7	0.00202627	0.0824404	3	250
CDKN1B		0.47	0.3 - 0.7	9.0862e-05	0.000501308	5	304		0.58	0.4 - 0.9	0.0183705	0.0495078	4	292		0.71	0.4 - 1.3	0.286371	0.385857	5	60		0.56	0.4 - 0.8	0.00431518	0.0204088	5	304		0.59	0.4 - 0.9	0.00889026	0.0471868	5	304		0.64	0.4 - 1.1	0.0999649	0.191599	7	75		0.49	0.3 - 0.9	0.0288617	0.190431	4	215
MLPH	1	0.46	0.3 - 0.7	0.000123003	0.000656015	2	485		0.61	0.4 - 0.9	0.027299	0.0615189	4	292		2	1.0 - 4.1	0.0530703	0.249943	8	24		0.67	0.4 - 1.0	0.0672415	0.1251	5	303
ANLN	1	2	1.4 - 2.9	0.000145999	0.000753545	7	182		2.9	1.9 - 4.6	3.73671e-06	7.77405e-05	8	98		0.76	0.4 - 1.6	0.449006	0.47894	7	36		1.7	1.2 - 2.5	0.00503204	0.0223646	7	182
KIF14		2.1	1.4 - 3.1	0.00015236	0.000761801	5	296		2.1	1.3 - 3.2	0.00162518	0.00747504	6	193		1.5	0.8 - 3.0	0.204054	0.36028	6	53		1.8	1.2 - 2.7	0.00322144	0.0185333	5	296		1.3	0.9 - 1.9	0.178374	0.230052	7	197		1.4	0.9 - 2.4	0.17401	0.269813	8	50		1.8	0.9 - 3.8	0.121711	0.260364	9	52
MCM2		2	1.4 - 2.9	0.00017161	0.000832048	6	243		2.1	1.3 - 3.3	0.00137451	0.00666427	6	195		0.63	0.3 - 1.3	0.235224	0.372573	7	37		1.7	1.2 - 2.5	0.00355164	0.0189421	6	243		0.62	0.4 - 1.1	0.100258	0.166694	2	486		1.3	0.8 - 2.2	0.256779	0.348719	3	174		0.56	0.3 - 1.1	0.0705564	0.220249	4	214
AKT1		2.1	1.4 - 3.0	0.000268973	0.00126576	8	122		2.7	1.7 - 4.3	2.61878e-05	0.000261878	8	98		1.6	0.8 - 3.2	0.199962	0.36028	8	24		2.4	1.6 - 3.5	2.11565e-05	0.000483578	8	122		2.3	1.5 - 3.4	3.24466e-05	0.00149254	8	122		3	1.9 - 4.8	2.77914e-06	0.000383521	8	50		1.7	0.8 - 3.5	0.132662	0.265324	8	72
PTTG1	1	2.5	1.5 - 4.1	0.000362299	0.00165623	3	425		2.4	1.5 - 3.8	0.000247613	0.00165075	8	98		1.3	0.6 - 2.5	0.517468	0.527356	7	36		2.1	1.3 - 3.5	0.00426388	0.0204088	3	425
FDFT1		0.52	0.4 - 0.7	0.000394042	0.0017513	4	364		0.48	0.3 - 0.8	0.00232434	0.0103304	5	243		0.41	0.2 - 1.1	0.06561	0.249943	8	24		0.47	0.3 - 0.8	0.00232514	0.0143086	7	182		0.6	0.4 - 0.9	0.00617956	0.0370774	3	424		0.43	0.2 - 0.9	0.0169169	0.0933815	8	50		0.45	0.2 - 0.9	0.0143653	0.180219	4	221
TMPRSS2		2.2	1.4 - 3.3	0.000493432	0.00213376	9	85		0.63	0.4 - 1.0	0.0529035	0.101983	5	205		3.4	1.8 - 6.5	0.000187792	0.0257986	8	25		2	1.3 - 3.1	0.00146628	0.00938422	9	85		2.5	1.6 - 3.9	3.08226e-05	0.00149254	9	85		1.6	1.0 - 2.6	0.0548582	0.138068	8	53		4	2.1 - 7.8	3.76208e-05	0.00297063	9	50
SLC44A4		0.5	0.3 - 0.7	0.000696051	0.0028751	2	489		1.5	0.9 - 2.4	0.131026	0.190584	8	98		1.3	0.7 - 2.5	0.377268	0.434265	3	60		1.5	1.0 - 2.4	0.0817538	0.143743	9	109		1.5	1.0 - 2.4	0.0653729	0.117553	9	109		1.4	0.8 - 2.4	0.275236	0.348719	9	41		1.8	0.9 - 3.5	0.100639	0.23945	8	72
NCOA3		1.9	1.3 - 2.7	0.000700805	0.0028751	7	182		1.8	1.2 - 2.8	0.00900986	0.0306719	6	194		1.9	1.0 - 3.6	0.0363827	0.201116	6	48		1.8	1.3 - 2.6	0.00135538	0.00938422	7	182		2.1	1.3 - 3.3	0.00130219	0.0179702	3	424		2.2	1.2 - 3.8	0.00685466	0.0639616	3	174		2.4	1.3 - 4.8	0.00890586	0.175573	8	72
AADAT		2.1	1.4 - 3.2	0.000731513	0.00288874	9	93		1.2	0.7 - 2.2	0.493593	0.503024	9	73		1.9	0.9 - 3.9	0.100687	0.303962	3	80		1.6	1.0 - 2.4	0.0575448	0.120011	9	93		1.9	1.2 - 2.9	0.00415172	0.0286469	9	93		1.8	1.0 - 3.0	0.0328838	0.100582	9	42		1.5	0.7 - 3.5	0.319811	0.404898	9	51
KAT8		0.34	0.2 - 0.6	0.000756422	0.00288874	7	130		0.36	0.2 - 0.7	0.00272098	0.0108839	6	132		0.54	0.2 - 1.5	0.250043	0.372783	8	19		0.39	0.2 - 0.7	0.00324333	0.0185333	7	130		0.38	0.2 - 0.7	0.0024136	0.0212437	7	130		0.21	0.1 - 0.7	0.00890755	0.0683771	9	31		0.54	0.3 - 1.1	0.076448	0.220249	2	156
CCNE2		2	1.3 - 3.1	0.000758293	0.00288874	9	96		2.2	1.4 - 3.5	0.000414292	0.00254949	7	150		0.76	0.4 - 1.4	0.391065	0.44389	6	53		1.7	1.1 - 2.7	0.01102	0.0401349	9	96		0.66	0.4 - 1.1	0.112985	0.170539	1	480		0.68	0.4 - 1.1	0.142029	0.24546	2	199		1.5	0.8 - 2.8	0.224978	0.324992	6	124
CCNE1	1	1.9	1.3 - 2.8	0.000802421	0.00298575	5	303		1.5	1.0 - 2.3	0.0719797	0.122519	6	194		0.58	0.3 - 1.2	0.127759	0.314867	6	48		1.5	1.0 - 2.3	0.0351576	0.0878939	5	303
SLC12A2		0.51	0.3 - 0.8	0.000947318	0.00339637	2	485		1.3	0.8 - 2.0	0.321461	0.359676	7	146		0.56	0.3 - 1.2	0.138012	0.315457	7	36		0.66	0.4 - 1.0	0.0500512	0.11058	2	485		1.8	1.1 - 2.8	0.010855	0.0499328	8	122		1.3	0.8 - 2.2	0.265149	0.348719	8	50		1.6	0.8 - 3.1	0.146118	0.277186	7	107
HMGB2		1.8	1.3 - 2.7	0.000955228	0.00339637	7	182		2.7	1.7 - 4.2	1.40567e-05	0.000194083	7	146		0.53	0.3 - 1.0	0.0633512	0.249943	2	96		1.8	1.3 - 2.6	0.00145432	0.00938422	7	182		1.5	1.0 - 2.2	0.0303466	0.0719586	7	182		1.6	1.0 - 2.5	0.0591493	0.145761	4	149		2.1	1.1 - 4.1	0.0291807	0.190431	8	72
DUSP5		0.54	0.4 - 0.8	0.00103709	0.00360728	3	424		1.6	1.0 - 2.6	0.0370068	0.0749505	7	146		0.47	0.2 - 0.9	0.0302845	0.195985	5	60		0.69	0.5 - 1.0	0.0653404	0.124458	3	424		1.7	1.1 - 2.7	0.018199	0.0609073	8	122		1.8	1.1 - 2.9	0.0242712	0.100582	8	50		0.66	0.3 - 1.3	0.211447	0.324992	3	250
EXO1	1	1.9	1.3 - 2.7	0.00125264	0.00426432	5	303		2.2	1.3 - 3.8	0.00268061	0.0108839	4	292		1.4	0.7 - 2.7	0.315317	0.411354	4	72		1.6	1.1 - 2.4	0.0121877	0.0414902	5	303
TFAP2B		0.56	0.4 - 0.8	0.00159986	0.00533288	3	393		0.47	0.3 - 0.8	0.00356551	0.0135829	1	406		0.62	0.3 - 1.2	0.149435	0.327529	5	52		0.65	0.4 - 0.9	0.0211361	0.063807	3	393		0.8	0.5 - 1.2	0.295179	0.329955	1	492		1.1	0.7 - 1.9	0.634093	0.634093	8	52		0.56	0.3 - 1.1	0.10939	0.247472	2	287
EIF4H		0.52	0.3 - 0.8	0.00173322	0.0056595	6	242		0.61	0.4 - 1.0	0.0359357	0.0737143	5	243		2	0.9 - 4.4	0.0792657	0.264219	3	84		0.63	0.4 - 1.0	0.0314005	0.0837348	6	242		1.4	0.9 - 2.3	0.113899	0.170539	2	485		1.8	1.1 - 3.1	0.0306934	0.100582	3	174		0.59	0.3 - 1.2	0.141513	0.275053	2	285
DNMT3B		1.8	1.2 - 2.5	0.00183194	0.00586219	6	244		1.8	1.1 - 2.7	0.0126444	0.0381238	6	195		1.7	0.9 - 3.2	0.115884	0.314867	7	36		1.7	1.2 - 2.4	0.00392718	0.0202693	6	244		1.8	1.3 - 2.6	0.000905192	0.0138796	6	244		1.7	1.1 - 2.6	0.0226569	0.100582	7	75		2.8	1.4 - 5.4	0.00238958	0.0824404	6	143
H19		0.54	0.4 - 0.8	0.00236512	0.00741997	6	243		0.52	0.3 - 0.8	0.0043369	0.0157705	3	340		3.1	1.4 - 6.9	0.00509953	0.163185	4	72		0.62	0.4 - 0.9	0.0226271	0.0658242	6	243		1.8	1.1 - 2.9	0.0188056	0.0609073	2	485		1.9	1.1 - 3.2	0.0271611	0.100582	3	174		1.1	0.6 - 2.2	0.697031	0.697031	7	107
S100P		1.8	1.2 - 2.5	0.00258412	0.00781265	6	272		2	1.3 - 3.1	0.00264598	0.0108839	7	172		1.1	0.6 - 2.2	0.685072	0.685072	4	72		1.6	1.1 - 2.3	0.0111304	0.0401349	6	272		1.6	1.1 - 2.3	0.0148257	0.0538406	6	272		1.2	0.8 - 1.9	0.332581	0.385682	5	125		2.5	1.3 - 4.8	0.00483889	0.129352	8	93
TNFRSF21		1.9	1.2 - 2.8	0.00258794	0.00781265	8	122		1.6	1.0 - 2.9	0.0749341	0.126205	3	340		0.63	0.3 - 1.5	0.296688	0.395584	8	24		1.6	0.9 - 2.9	0.0852688	0.145138	2	485		1.6	1.1 - 2.3	0.0214188	0.0615789	7	182		1.7	1.0 - 2.6	0.0301952	0.100582	7	75		2.1	1.1 - 4.0	0.0279044	0.190431	7	107
SMYD2		1.8	1.2 - 2.7	0.00325096	0.00963247	8	122		0.59	0.4 - 0.9	0.0234576	0.0560182	3	340		2.2	1.1 - 4.1	0.0178825	0.195985	7	36		1.8	1.2 - 2.7	0.00433687	0.0204088	8	122		1.9	1.2 - 2.8	0.00246303	0.0212437	8	122		2.2	1.4 - 3.6	0.00148381	0.0227518	8	50		0.49	0.3 - 0.9	0.0340298	0.190431	4	214
MTHFD2		1.8	1.2 - 2.7	0.0035211	0.0102432	8	122		1.9	1.2 - 3.1	0.00933128	0.0311043	8	98		0.78	0.4 - 1.5	0.455279	0.482114	3	84		1.5	1.0 - 2.3	0.0412948	0.0971642	8	122		1.5	1.0 - 2.2	0.0655909	0.117553	8	122		1.6	1.0 - 2.5	0.0325105	0.100582	6	100		0.75	0.4 - 1.4	0.386104	0.43319	4	214
MBOAT1		0.58	0.4 - 0.8	0.00387203	0.0110629	5	303		0.71	0.5 - 1.1	0.137189	0.194191	4	292		2.4	1.1 - 5.2	0.0306227	0.195985	3	84		0.73	0.5 - 1.1	0.123044	0.182288	5	303		0.75	0.5 - 1.1	0.131408	0.183175	5	303		0.83	0.5 - 1.5	0.515734	0.535122	8	50		0.44	0.2 - 0.8	0.0109985	0.177908	3	250
KLF10		0.56	0.4 - 0.8	0.00415439	0.0116614	6	244		0.55	0.3 - 0.9	0.0162065	0.0454918	6	196		0.61	0.3 - 1.2	0.160556	0.336913	2	96		0.62	0.4 - 0.9	0.020001	0.0615415	6	244		0.78	0.5 - 1.2	0.250791	0.295377	6	244		0.81	0.5 - 1.4	0.474241	0.499582	8	50		0.68	0.3 - 1.4	0.288039	0.374994	2	285
MYLIP		0.57	0.4 - 0.8	0.00534298	0.0147393	2	485		1.9	1.2 - 3.1	0.011319	0.0355105	8	98		0.55	0.3 - 1.1	0.077067	0.264219	5	60		1.5	1.0 - 2.3	0.0716874	0.130952	8	122		1.6	1.1 - 2.5	0.0273925	0.070003	8	122		0.71	0.5 - 1.1	0.128669	0.233636	4	149		2.2	1.1 - 4.3	0.026616	0.190431	8	72
ZWINT		1.9	1.2 - 3.1	0.00572673	0.0153049	3	424		2.3	1.5 - 3.6	0.000220262	0.00153226	7	146		0.68	0.3 - 1.3	0.258651	0.372831	6	48		1.8	1.1 - 2.8	0.0158827	0.0508247	3	424		0.75	0.5 - 1.2	0.218037	0.263939	4	364		0.8	0.5 - 1.3	0.343605	0.395146	3	175		0.66	0.3 - 1.4	0.258847	0.350205	2	285
MCM3		1.8	1.2 - 2.6	0.00573934	0.0153049	8	122		2.2	1.4 - 3.5	0.00095957	0.00479945	8	99		0.71	0.3 - 1.5	0.354705	0.426036	7	36		1.4	0.9 - 2.1	0.134318	0.191883	8	122		1.3	0.9 - 2.0	0.199993	0.24864	8	122		1.8	0.9 - 3.4	0.0737345	0.166809	2	199		0.48	0.2 - 0.9	0.0332587	0.190431	2	285
PSRC1		1.6	1.1 - 2.3	0.00802958	0.0207751	6	243		1.9	1.2 - 3.0	0.00427802	0.0157705	6	195		1.4	0.7 - 2.6	0.30361	0.401467	5	60		1.6	1.1 - 2.3	0.0112879	0.0401349	6	243		1.5	1.1 - 2.2	0.0246275	0.0653576	6	243		1.8	1.1 - 2.8	0.0130942	0.0803778	5	125		0.63	0.3 - 1.3	0.197926	0.313952	2	285
CHD7		1.7	1.2 - 2.6	0.00805034	0.0207751	8	122		2.2	1.4 - 3.6	0.000921247	0.00479945	8	98		1.7	0.8 - 3.5	0.164248	0.336913	3	84		1.6	1.1 - 2.4	0.0223566	0.0658242	8	122		1.5	1.0 - 2.2	0.028281	0.0709597	7	182		1.7	1.1 - 2.7	0.0143956	0.0827746	7	76		0.66	0.3 - 1.3	0.249229	0.340531	2	285
PTEN		0.61	0.4 - 0.9	0.00894379	0.0227144	3	424		0.48	0.3 - 0.8	0.00281254	0.0109758	2	389		1.3	0.7 - 2.6	0.371497	0.430721	4	72		0.74	0.5 - 1.1	0.122256	0.182288	3	424		1.6	1.0 - 2.3	0.0312864	0.0719586	6	243		1.3	0.8 - 2.2	0.278878	0.349865	8	50		1.8	0.9 - 3.6	0.0920354	0.226888	8	73
LMNB2		1.6	1.1 - 2.3	0.0112562	0.0281404	7	182		1.6	1.0 - 2.6	0.0316545	0.0686128	7	146		0.51	0.2 - 1.3	0.163713	0.336913	8	24		1.5	1.0 - 2.1	0.046836	0.107054	7	182		1.3	0.9 - 1.9	0.139068	0.190013	7	182		1.7	1.1 - 2.6	0.024757	0.100582	6	100		0.64	0.3 - 1.3	0.227076	0.324992	2	285
GPER		0.6	0.4 - 0.9	0.0119107	0.0293186	2	485		0.61	0.4 - 1.0	0.0317334	0.0686128	3	341		1.4	0.7 - 2.5	0.327395	0.418402	6	48		0.65	0.4 - 1.0	0.0394311	0.0941639	2	485		1.3	0.9 - 2.0	0.228824	0.272222	7	182		0.78	0.5 - 1.2	0.295674	0.357921	3	174		1.4	0.7 - 2.8	0.277535	0.368571	7	107
ERBB3		0.62	0.4 - 0.9	0.0123691	0.0299856	3	424		1.8	1.1 - 2.9	0.0204083	0.0518307	8	98		1.4	0.8 - 2.7	0.242043	0.372573	6	48		2.2	1.4 - 3.5	0.000508709	0.00428387	8	122		1.8	1.2 - 2.8	0.00408226	0.0286469	8	122		1.4	0.9 - 2.2	0.150008	0.249411	7	75		0.5	0.3 - 1.0	0.04211	0.191628	2	285
HELLS		1.6	1.1 - 2.3	0.01345	0.0317374	7	182		1.8	1.1 - 3.1	0.0180484	0.0495078	4	292		0.56	0.2 - 1.3	0.189071	0.355899	8	24		1.5	1.0 - 2.1	0.0389334	0.0941639	7	182		0.71	0.5 - 1.1	0.132803	0.183268	8	122		0.71	0.4 - 1.2	0.180825	0.274472	7	75		0.53	0.2 - 1.2	0.128295	0.260364	1	317
TAX1BP1		0.6	0.4 - 0.9	0.0134884	0.0317374	2	485		0.76	0.5 - 1.3	0.297831	0.337964	2	389		0.78	0.4 - 1.5	0.478528	0.493964	3	84		0.69	0.4 - 1.2	0.1795	0.230575	8	122		1.3	0.9 - 2.1	0.181305	0.231667	7	182		1.2	0.8 - 2.0	0.350939	0.400244	7	75		1.3	0.7 - 2.5	0.418592	0.450971	6	143
FOSB		0.63	0.4 - 0.9	0.0156996	0.0357189	5	303		1.4	0.8 - 2.5	0.282189	0.327176	2	389		0.28	0.1 - 0.7	0.00453748	0.163185	7	36		0.7	0.5 - 1.0	0.0599729	0.121464	5	303		1.7	1.1 - 2.6	0.0189784	0.0609073	7	182		1.4	0.9 - 2.2	0.200774	0.29165	4	149		1.7	0.9 - 3.3	0.126038	0.260364	5	179
TGFBI		1.6	1.1 - 2.5	0.015862	0.0357189	8	122		1.5	0.9 - 2.6	0.0880152	0.143698	8	98		1.4	0.7 - 2.9	0.356367	0.426036	8	24		1.4	0.9 - 2.1	0.107669	0.170564	8	122		1.7	1.1 - 2.6	0.00888607	0.0471868	8	122		2.4	1.5 - 3.9	0.000221586	0.00764472	8	50		1.4	0.7 - 2.7	0.286287	0.374994	6	143
ISG15		1.6	1.1 - 2.2	0.0158843	0.0357189	6	243		2.5	1.6 - 4.0	5.96085e-05	0.000501967	6	194		0.48	0.2 - 0.9	0.0294062	0.195985	4	72		1.4	1.0 - 2.0	0.0668191	0.1251	6	243		1.3	0.8 - 2.3	0.339352	0.368745	2	485		0.77	0.5 - 1.2	0.251172	0.346618	6	100		1.8	0.9 - 3.4	0.0794421	0.220249	7	107
ENTPD6		0.64	0.4 - 0.9	0.0160735	0.0357189	5	304		0.74	0.5 - 1.2	0.178976	0.230936	4	292		0.72	0.3 - 1.5	0.365021	0.426302	2	96		0.77	0.5 - 1.1	0.170467	0.225411	5	304		0.8	0.6 - 1.2	0.252568	0.295377	5	304		1.2	0.8 - 1.9	0.408615	0.447531	5	125		0.55	0.3 - 1.1	0.0885018	0.226171	2	286
TRIM4		0.65	0.5 - 0.9	0.0197585	0.0433064	4	364		0.66	0.4 - 1.0	0.0688184	0.119574	4	292		0.71	0.3 - 1.4	0.339647	0.421268	2	96		0.77	0.5 - 1.1	0.166894	0.224396	4	364		0.84	0.6 - 1.2	0.36396	0.386357	4	364		0.68	0.4 - 1.1	0.141331	0.24546	2	199		0.46	0.2 - 0.9	0.0190206	0.190431	3	250
BAD		0.62	0.4 - 0.9	0.0210521	0.0455181	2	485		1.3	0.8 - 2.1	0.222175	0.271359	4	292		1.7	0.9 - 3.1	0.114676	0.314867	7	36		1.3	0.8 - 2.0	0.252724	0.28476	8	122		1.4	0.9 - 2.3	0.110363	0.170539	8	122		1.6	1.1 - 2.5	0.0253239	0.100582	6	100		1.4	0.7 - 2.6	0.372999	0.421917	7	107
H3F3A		0.62	0.4 - 0.9	0.0236556	0.0504653	2	486		1.6	1.0 - 2.6	0.0644423	0.11787	8	99		1.8	1.0 - 3.5	0.0689685	0.250795	7	36		1.7	1.1 - 2.6	0.0120699	0.0414902	8	124		1.8	1.2 - 2.7	0.00521514	0.0342709	8	124		2.4	1.6 - 3.8	6.6458e-05	0.00305707	7	76		0.57	0.3 - 1.2	0.127672	0.260364	2	288
SKP2		1.5	1.1 - 2.2	0.0258902	0.0545058	5	303		1.8	1.1 - 2.8	0.0154813	0.0442322	5	244		1.5	0.8 - 2.9	0.183547	0.353135	5	60		1.3	0.9 - 2.0	0.1195	0.180377	5	303		1.6	1.1 - 2.2	0.016825	0.0595346	6	243		1.7	1.1 - 2.9	0.0299831	0.100582	8	50		1.6	0.8 - 3.0	0.180798	0.297025	7	107
FEN1		1.6	1.1 - 2.4	0.0264437	0.0548333	8	122		1.7	1.0 - 2.8	0.043808	0.0865343	8	98		1.4	0.6 - 2.9	0.413135	0.44967	8	24		1.4	1.0 - 2.0	0.0800906	0.142383	7	182		1.5	1.0 - 2.2	0.061242	0.116548	8	122		1.4	0.9 - 2.4	0.170456	0.267305	8	50		1.6	0.8 - 3.2	0.231235	0.325616	8	72
PHGDH	1	1.6	1.1 - 2.4	0.0267312	0.0548333	8	122		1.4	0.9 - 2.2	0.140661	0.194191	6	195		0.47	0.3 - 0.9	0.0153684	0.195985	3	84		0.71	0.5 - 1.1	0.131516	0.191296	7	182
ASH1L		0.66	0.5 - 1.0	0.027896	0.0564982	3	424		0.7	0.4 - 1.2	0.168529	0.223923	2	389		1.3	0.6 - 2.8	0.46675	0.488104	8	24		0.84	0.6 - 1.2	0.38873	0.40919	3	424		1.5	1.0 - 2.3	0.0633414	0.116548	7	182		1.2	0.8 - 1.8	0.471153	0.499582	6	100		1.5	0.8 - 2.9	0.228437	0.324992	5	179
NUDT1		1.5	1.0 - 2.2	0.0291932	0.0583864	7	182		1.5	1.0 - 2.4	0.0669359	0.118997	7	146		1.4	0.7 - 2.9	0.318799	0.411354	8	24		1.3	0.9 - 1.9	0.200414	0.246664	7	182		1.2	0.8 - 1.9	0.296481	0.329955	8	122		2	1.2 - 3.2	0.00624783	0.0639616	8	50		1.6	0.6 - 4.2	0.299238	0.385933	2	285
HMOX1		1.6	1.0 - 2.5	0.0303412	0.0593145	3	424		1.9	1.1 - 3.3	0.0264197	0.0603879	3	340		0.38	0.2 - 0.9	0.0216574	0.195985	7	36		1.6	1.0 - 2.5	0.0333063	0.0870386	3	424		1.9	1.2 - 2.9	0.00569422	0.0357183	3	424		2.1	1.2 - 3.6	0.0103244	0.071238	3	174		2.9	0.9 - 9.5	0.0766327	0.220249	2	285
MCM5		1.5	1.0 - 2.2	0.0303987	0.0593145	5	308		1.7	1.1 - 2.7	0.0277921	0.0617601	5	244		0.76	0.4 - 1.5	0.421693	0.455884	6	48		1.3	0.9 - 1.8	0.231123	0.267968	5	308		0.61	0.4 - 1.0	0.0571156	0.112599	1	514		1.3	0.8 - 2.1	0.230866	0.321813	4	149		0.56	0.3 - 1.1	0.0845883	0.220249	2	254
OSGIN1		1.5	1.0 - 2.2	0.0310531	0.0598613	4	300		1.2	0.8 - 1.9	0.42411	0.43779	4	232		2.7	1.2 - 5.8	0.0123617	0.195985	3	77		1.4	1.0 - 2.0	0.062398	0.121734	4	300		1.3	0.9 - 1.9	0.153302	0.20342	4	300		1.5	0.9 - 2.3	0.0995161	0.191599	4	142		1.9	0.8 - 4.4	0.122322	0.260364	9	46
LRR1		0.67	0.5 - 1.0	0.0319834	0.0609207	3	297		0.65	0.4 - 1.0	0.0654819	0.11787	3	243		0.58	0.2 - 1.5	0.254564	0.372783	8	21		0.7	0.5 - 1.0	0.0610118	0.121689	3	297		0.75	0.5 - 1.1	0.123673	0.17778	3	297		0.8	0.5 - 1.3	0.325809	0.381031	4	102		0.68	0.4 - 1.3	0.238102	0.3319	3	181
FTLP2		1.5	1.0 - 2.2	0.0324282	0.0610412	7	182		1.5	0.9 - 2.5	0.130278	0.190584	8	98		1.5	0.8 - 2.7	0.238906	0.372573	5	60		1.4	0.9 - 2.0	0.0912617	0.150535	7	182		1.5	1.1 - 2.2	0.0229791	0.0647168	7	182		1.6	1.0 - 2.5	0.0540124	0.138068	7	75		1.7	0.9 - 3.3	0.105197	0.24299	7	108
PRR5		0.67	0.5 - 1.0	0.033552	0.0622049	3	424		1.5	0.9 - 2.5	0.125721	0.187994	8	98		0.59	0.3 - 1.2	0.135353	0.314867	2	96		0.77	0.5 - 1.1	0.170197	0.225411	3	424		2	1.3 - 3.0	0.00146	0.0183164	7	182		1.8	1.1 - 2.9	0.0254629	0.100582	8	50		1.4	0.7 - 2.9	0.344101	0.415003	8	72
SETDB1		0.64	0.4 - 1.0	0.0338239	0.0622049	2	485		0.57	0.4 - 0.9	0.0254569	0.0590305	2	389		2.1	1.1 - 4.0	0.0226518	0.195985	7	36		0.75	0.5 - 1.1	0.165364	0.224222	2	485		0.72	0.5 - 1.1	0.113582	0.170539	2	485		0.81	0.5 - 1.4	0.439477	0.470138	2	199		0.6	0.3 - 1.2	0.158593	0.284232	2	285
GABPB2		0.63	0.4 - 1.0	0.0348675	0.0632091	7	183		0.68	0.4 - 1.1	0.11057	0.167985	6	196		1.4	0.7 - 2.9	0.329492	0.418402	3	84		0.77	0.5 - 1.2	0.258627	0.289372	7	183		1.2	0.7 - 2.0	0.474698	0.485247	8	122		0.83	0.5 - 1.4	0.496064	0.518612	2	199		1.3	0.7 - 2.4	0.465189	0.486333	5	179
MAPK1		0.67	0.5 - 1.0	0.0351601	0.0632091	3	425		0.56	0.4 - 0.9	0.0119375	0.0367308	3	340		1.5	0.8 - 3.1	0.227533	0.371884	8	24		0.67	0.5 - 1.0	0.0384868	0.0941639	3	425		1.6	1.1 - 2.5	0.0239374	0.0647719	8	123		1.3	0.8 - 2.2	0.292969	0.357785	8	50		1.9	1.0 - 3.8	0.0628257	0.220249	8	72
PPP1CC		0.67	0.5 - 1.0	0.0361029	0.0636235	3	424		1.3	0.8 - 2.2	0.332153	0.369058	8	98		0.68	0.3 - 1.3	0.255581	0.372783	6	48		0.77	0.5 - 1.1	0.176841	0.230037	3	424		1.4	0.9 - 2.2	0.186341	0.235918	8	123		1.7	0.9 - 3.2	0.0988027	0.191599	2	199		0.6	0.3 - 1.2	0.151494	0.277337	2	285
POLD1		1.5	1.0 - 2.1	0.0361859	0.0636235	6	243		2	1.3 - 3.1	0.00243779	0.0105418	6	196		0.6	0.3 - 1.1	0.109391	0.312544	5	60		1.4	0.9 - 2.0	0.0932436	0.152235	6	243		1.4	1.0 - 2.0	0.0764888	0.133613	6	243		1.5	0.9 - 2.4	0.0829517	0.176113	7	75		1.4	0.7 - 2.6	0.306774	0.391989	6	143
MCM7		1.5	1.0 - 2.1	0.0368065	0.0640112	5	303		1.6	1.0 - 2.5	0.0567228	0.108043	5	243		1.4	0.7 - 2.6	0.337392	0.421268	5	60		1.4	1.0 - 2.1	0.0504519	0.11058	5	303		1.6	1.1 - 2.3	0.0195873	0.0609378	5	303		1.6	1.0 - 2.5	0.0528845	0.138068	5	125		1.5	0.8 - 2.9	0.21491	0.324992	5	179
AMD1		1.5	1.0 - 2.1	0.0375137	0.0643644	5	303		1.5	1.0 - 2.4	0.0655653	0.11787	5	243		1.3	0.7 - 2.4	0.488869	0.501404	4	72		1.3	0.9 - 1.8	0.222381	0.259715	5	303		1.6	1.1 - 2.3	0.011227	0.0499782	5	303		1.5	1.0 - 2.3	0.0655424	0.155946	5	125		1.7	0.9 - 3.3	0.0937147	0.226888	6	143
KDM5B		0.68	0.5 - 1.0	0.0378141	0.0643644	4	364		0.55	0.4 - 0.9	0.00975018	0.0312006	4	292		2.4	1.2 - 4.7	0.0117965	0.195985	8	24		0.82	0.5 - 1.4	0.45107	0.45678	8	122		1.2	0.8 - 1.8	0.436669	0.453085	7	182		2.2	1.1 - 4.3	0.0311244	0.100582	2	199		0.47	0.2 - 0.9	0.0250668	0.190431	3	250
REPS2		0.65	0.4 - 1.0	0.0394564	0.0664529	2	485		1.7	1.0 - 3.0	0.0613044	0.114055	3	340		1.4	0.8 - 2.6	0.276514	0.379376	5	60		1.5	0.9 - 2.6	0.101521	0.164074	3	424		0.83	0.5 - 1.3	0.447013	0.460357	8	122		1.4	0.9 - 2.1	0.165923	0.264746	6	100		0.44	0.2 - 1.0	0.0518015	0.211719	7	107
CDH3	1	1.6	1.0 - 2.4	0.0402061	0.0670101	8	122		0.61	0.4 - 1.0	0.0353028	0.0733564	3	345		0.62	0.3 - 1.2	0.130763	0.314867	3	84		0.57	0.4 - 0.9	0.00926785	0.0353061	2	485
PDLIM3		1.5	1.0 - 2.3	0.041417	0.067884	8	122		1.7	1.0 - 2.8	0.0381825	0.076365	8	98		0.67	0.3 - 1.3	0.241752	0.372573	6	48		1.6	1.1 - 2.4	0.0282296	0.0767944	8	122		2.1	1.4 - 3.1	0.00070622	0.0121823	8	122		1.9	1.2 - 3.1	0.00620355	0.0639616	8	50		1.8	0.9 - 3.7	0.0804016	0.220249	8	74
SPINT1		1.5	1.0 - 2.3	0.041579	0.067884	8	122		1.6	1.0 - 2.7	0.0582731	0.109691	8	98		2.1	1.1 - 4.2	0.0246179	0.195985	8	24		1.7	1.1 - 2.6	0.0138173	0.0451178	8	122		2	1.3 - 3.0	0.00161898	0.0186183	8	122		2.2	1.3 - 3.5	0.00144467	0.0227518	8	50		0.69	0.3 - 1.4	0.325044	0.407625	2	285
HSPH1		1.5	1.0 - 2.3	0.0422641	0.0683056	8	122		1.7	1.1 - 2.8	0.0232273	0.0560182	8	98		1.7	0.9 - 3.2	0.0815213	0.266192	6	48		1.5	1.0 - 2.2	0.0536037	0.114355	8	122		1.4	1.0 - 2.0	0.0743232	0.131495	7	182		1.5	1.0 - 2.4	0.0611487	0.148044	5	125		1.4	0.7 - 2.9	0.361432	0.415647	8	72
NUPR1		0.69	0.5 - 1.0	0.0432589	0.0692143	4	365		0.7	0.4 - 1.1	0.12754	0.188949	3	340		1.9	0.9 - 3.7	0.077833	0.264219	8	24		1.6	1.1 - 2.3	0.0247567	0.0698184	7	182		1.8	1.1 - 2.7	0.00973399	0.0493736	8	122		1.4	0.8 - 2.4	0.198169	0.290929	8	50		2.1	1.1 - 4.0	0.0212559	0.190431	7	108
VDAC1		0.65	0.4 - 1.0	0.0501039	0.0792634	7	182		0.59	0.4 - 1.0	0.034335	0.072909	6	195		1.8	1.0 - 3.4	0.0645521	0.249943	5	60		0.75	0.5 - 1.2	0.205864	0.247655	7	182		0.77	0.5 - 1.2	0.226886	0.272222	2	485		0.76	0.4 - 1.3	0.291666	0.357785	2	199		0.53	0.3 - 1.1	0.083962	0.220249	6	143
PCK2		0.69	0.5 - 1.0	0.05071	0.0792634	3	424		1.5	0.9 - 2.3	0.0925789	0.149623	6	195		0.7	0.4 - 1.3	0.270394	0.379376	3	84		1.4	1.0 - 2.0	0.0783295	0.140817	6	243		1.4	0.9 - 1.9	0.104715	0.170539	6	243		1.6	1.0 - 2.6	0.0770659	0.168811	8	50		0.77	0.4 - 1.6	0.487632	0.501564	2	285
CXADR		0.69	0.5 - 1.0	0.0510258	0.0792634	3	424		0.66	0.4 - 1.0	0.0685325	0.119574	3	340		0.59	0.3 - 1.2	0.135786	0.314867	2	97		0.66	0.5 - 1.0	0.0283179	0.0767944	3	424		1.5	1.0 - 2.3	0.0601803	0.116548	8	122		1.6	1.0 - 2.4	0.0550272	0.138068	7	75		1.5	0.7 - 3.2	0.241642	0.333466	8	72
FTH1		1.4	1.0 - 2.1	0.0554214	0.0852637	6	248		1.5	0.9 - 2.3	0.100198	0.15873	5	244		2.4	1.3 - 4.6	0.00823762	0.190822	8	24		1.7	1.2 - 2.5	0.00586655	0.0253689	6	248		2	1.4 - 3.0	0.00018394	0.00423063	6	248		2.2	1.4 - 3.4	0.000698228	0.0192711	7	77		1.9	1.0 - 3.5	0.0612295	0.220249	7	109
NCS1		0.67	0.4 - 1.0	0.0561238	0.085522	7	208		0.48	0.3 - 0.9	0.019404	0.0500747	8	123		0.62	0.3 - 1.2	0.135347	0.314867	5	60		0.56	0.4 - 0.9	0.00638972	0.0261342	7	208		0.7	0.5 - 1.0	0.0798	0.137655	7	208		1.3	0.8 - 2.0	0.268683	0.348719	5	125		0.49	0.3 - 0.9	0.0323735	0.190431	2	262
S100A4		0.67	0.4 - 1.0	0.056802	0.0857389	2	485		0.59	0.4 - 1.0	0.0346318	0.072909	2	389		0.7	0.4 - 1.3	0.275372	0.379376	4	72		0.62	0.4 - 0.9	0.0248728	0.0698184	2	485		1.6	1.1 - 2.3	0.0253115	0.0659054	7	182		1.5	1.0 - 2.4	0.0716866	0.164879	7	76		1.4	0.7 - 2.6	0.367018	0.418582	5	179
PLCG1		1.4	1.0 - 2.1	0.0618424	0.0924746	7	182		1.4	0.9 - 2.2	0.140581	0.194191	7	147		1.9	1.0 - 3.7	0.0609756	0.249943	8	24		1.5	1.0 - 2.1	0.044129	0.102328	7	182		1.8	1.2 - 2.6	0.00343878	0.026364	7	182		2	1.2 - 3.2	0.00695235	0.0639616	8	50		1.9	1.0 - 3.5	0.0560585	0.220249	6	144
CXXC5	1	0.67	0.4 - 1.0	0.0630216	0.0933653	2	485		1.8	1.1 - 3.0	0.0147541	0.0429212	8	98		1.8	0.9 - 3.5	0.0985523	0.303962	8	24		1.7	1.1 - 2.6	0.00833845	0.0325403	6	243
USP21		0.71	0.5 - 1.0	0.0685303	0.100595	5	303		0.71	0.4 - 1.1	0.146546	0.200405	3	340		2.6	1.3 - 5.4	0.00834846	0.190822	4	72		1.5	0.9 - 2.4	0.113421	0.174494	2	485		1.5	0.9 - 2.3	0.112133	0.170539	2	485		2.2	1.2 - 4.0	0.00891875	0.0683771	3	174		0.75	0.4 - 1.6	0.447917	0.471851	2	286
MGST1		0.71	0.5 - 1.0	0.0701245	0.101083	3	424		0.53	0.3 - 0.8	0.00540751	0.0192267	4	305		2.6	1.1 - 5.8	0.024588	0.195985	3	84		0.67	0.5 - 1.0	0.0337275	0.0870386	3	424		0.7	0.5 - 1.0	0.0549897	0.111203	3	424		0.81	0.5 - 1.3	0.364559	0.405719	3	174		0.44	0.2 - 1.0	0.0406788	0.191628	1	317
ACTR3B	1	0.68	0.5 - 1.0	0.0703157	0.101083	2	485		0.56	0.3 - 0.9	0.0188748	0.0495078	2	389		2.3	1.2 - 4.3	0.0142261	0.195985	6	48		0.77	0.5 - 1.2	0.208566	0.249034	2	485
DLC1		0.71	0.5 - 1.0	0.0707583	0.101083	3	424		0.67	0.4 - 1.1	0.0876853	0.143698	3	340		1.4	0.7 - 2.6	0.35719	0.426036	4	72		0.82	0.6 - 1.2	0.311313	0.341165	6	243		1.4	0.9 - 2.1	0.0917505	0.156316	5	303		1.4	0.9 - 2.2	0.140287	0.24546	7	75		0.7	0.3 - 1.4	0.333238	0.410597	2	285
SERHL		0.7	0.5 - 1.0	0.072294	0.102363	3	220		0.69	0.4 - 1.1	0.140788	0.194191	4	168		0.79	0.4 - 1.7	0.556744	0.563791	4	24		0.79	0.5 - 1.2	0.242609	0.277268	3	220		1.3	0.8 - 2.2	0.315682	0.345747	8	83		0.69	0.4 - 1.2	0.182981	0.274472	4	64		1.9	0.9 - 4.0	0.0765723	0.220249	8	55
AKR1C2		0.7	0.5 - 1.0	0.0809107	0.113559	2	474		0.68	0.4 - 1.2	0.199278	0.247166	1	421		0.58	0.3 - 1.2	0.125262	0.314867	2	95		0.68	0.5 - 1.0	0.0616051	0.121689	2	474		1.6	1.1 - 2.4	0.0236738	0.0647719	8	158		1.5	0.9 - 2.6	0.117268	0.220986	9	42		2.1	1.0 - 4.1	0.0391117	0.191628	9	64
HSPD1		1.4	0.9 - 2.2	0.0942527	0.131134	8	122		1.4	0.9 - 2.4	0.168802	0.223923	8	98		1.8	1.0 - 3.4	0.0556787	0.249943	6	48		1.4	0.9 - 2.1	0.10272	0.164352	8	122		1.3	0.8 - 1.9	0.270624	0.311217	8	122		1.7	1.1 - 2.9	0.0263751	0.100582	8	50		1.3	0.7 - 2.4	0.475702	0.493585	5	179
OSR2		0.72	0.5 - 1.1	0.097388	0.133817	6	244		0.82	0.5 - 1.3	0.387062	0.410132	6	194		1.7	0.7 - 4.0	0.244501	0.372573	2	96		0.85	0.6 - 1.3	0.404252	0.422748	6	244		1.2	0.8 - 1.8	0.305888	0.3377	3	424		1.3	0.7 - 2.3	0.373901	0.412786	2	198		1.6	0.8 - 3.3	0.180382	0.297025	8	73
RFX1		0.74	0.5 - 1.1	0.0978536	0.133817	4	364		1.3	0.8 - 2.2	0.268658	0.313762	8	98		1.4	0.7 - 2.8	0.393953	0.44389	3	84		1.4	0.9 - 2.2	0.136399	0.193132	8	122		1.8	1.1 - 2.7	0.0138837	0.0517823	8	122		1.9	1.1 - 3.0	0.012662	0.0803778	8	50		0.8	0.4 - 1.7	0.556108	0.560167	2	285
FAM134B		0.71	0.5 - 1.1	0.106008	0.14374	2	485		1.8	1.1 - 2.9	0.0128668	0.0381238	5	243		0.58	0.2 - 1.4	0.219122	0.365786	8	24		1.6	1.0 - 2.6	0.0351162	0.0878939	8	122		1.4	0.9 - 2.2	0.127212	0.179135	8	122		1.3	0.8 - 2.2	0.316115	0.372853	8	50		1.3	0.7 - 2.6	0.39375	0.436144	5	179
FABP5		1.3	0.9 - 1.9	0.107529	0.144577	5	303		1.5	0.9 - 2.3	0.0960391	0.153663	5	243		0.71	0.4 - 1.3	0.286981	0.385857	3	84		1.2	0.8 - 1.7	0.317741	0.34584	5	303		1.6	1.1 - 2.3	0.0137995	0.0517823	5	303		1.5	0.9 - 2.3	0.0959027	0.191599	6	100		1.7	0.8 - 3.4	0.152736	0.277337	4	214
SH3YL1		1.3	0.9 - 1.9	0.109059	0.145412	5	303		1.6	1.0 - 2.4	0.0470343	0.0917743	6	195		1.7	0.8 - 3.5	0.176563	0.348767	3	84		1.4	1.0 - 2.1	0.0501762	0.11058	5	303		1.8	1.2 - 2.6	0.00225459	0.0212437	5	303		1.8	1.2 - 2.8	0.00650822	0.0639616	6	100		1.9	0.9 - 4.0	0.070395	0.220249	4	215
SAFB2		0.74	0.5 - 1.1	0.110487	0.146098	3	424		0.7	0.4 - 1.1	0.157408	0.213435	2	389		1.2	0.6 - 2.2	0.621553	0.625463	7	36		0.76	0.5 - 1.2	0.19416	0.2427	2	485		0.74	0.5 - 1.1	0.146516	0.196302	2	485		0.72	0.4 - 1.2	0.209263	0.300816	2	199		0.61	0.3 - 1.3	0.175635	0.297025	7	127
THOC3		0.75	0.5 - 1.1	0.111939	0.146805	2	305		0.71	0.5 - 1.1	0.139639	0.194191	2	244		0.62	0.3 - 1.2	0.130949	0.314867	2	60		0.73	0.5 - 1.0	0.0883253	0.14873	2	305		0.7	0.5 - 1.0	0.0556016	0.111203	2	305		0.6	0.4 - 0.9	0.0247916	0.100582	2	132		1.3	0.7 - 2.6	0.42156	0.450971	6	96
PNPLA6		0.74	0.5 - 1.1	0.113068	0.147081	3	424		0.73	0.5 - 1.2	0.185022	0.233772	3	340		1.6	0.8 - 2.9	0.165691	0.336913	6	48		1.4	0.9 - 2.1	0.150451	0.209323	8	122		1.6	1.1 - 2.4	0.0123722	0.0517823	5	303		1.6	1.0 - 2.6	0.0330155	0.100582	7	75		1.9	1.0 - 3.6	0.0521626	0.211719	6	143
SNRPA1		0.74	0.5 - 1.1	0.114242	0.147409	3	424		0.74	0.5 - 1.2	0.191784	0.239731	3	340		0.69	0.3 - 1.5	0.337253	0.421268	7	36		0.74	0.5 - 1.1	0.112716	0.174494	3	424		0.74	0.5 - 1.1	0.117711	0.172799	3	424		1.3	0.8 - 2.0	0.275437	0.348719	5	125		0.66	0.3 - 1.3	0.2175	0.324992	3	250
RASD1		0.72	0.5 - 1.1	0.116516	0.14914	2	485		0.81	0.5 - 1.3	0.383211	0.408758	6	194		0.48	0.2 - 1.2	0.130585	0.314867	8	24		0.75	0.5 - 1.1	0.175673	0.230037	2	485		0.89	0.5 - 1.5	0.643061	0.643061	8	123		1.2	0.8 - 1.9	0.421185	0.45409	6	100		0.77	0.4 - 1.5	0.43988	0.466949	3	250
MCL1		0.75	0.5 - 1.1	0.122663	0.155763	4	364		0.78	0.5 - 1.3	0.356512	0.387066	2	389		0.66	0.3 - 1.2	0.193108	0.35909	4	72		0.8	0.6 - 1.1	0.22034	0.259224	5	303		1.5	0.9 - 2.4	0.118956	0.172799	8	122		1.3	0.7 - 2.4	0.358673	0.405712	2	199		1.7	0.9 - 3.3	0.0934147	0.226888	7	107
MMD		1.4	0.9 - 2.1	0.125068	0.157566	8	122		1.4	0.9 - 2.3	0.11129	0.167985	5	243		1.8	0.7 - 4.7	0.201465	0.36028	2	96		1.5	1.0 - 2.3	0.0585183	0.120038	8	122		1.7	1.1 - 2.6	0.0100178	0.0493736	8	122		1.7	1.0 - 2.8	0.0335273	0.100582	8	50		1.7	0.9 - 3.2	0.137831	0.271724	5	179
SC4MOL		0.75	0.5 - 1.1	0.128359	0.160449	3	406		0.49	0.3 - 0.8	0.00163516	0.00747504	3	319		2	1.0 - 3.9	0.0481086	0.240543	8	24		0.75	0.5 - 1.1	0.132735	0.19133	6	254		0.57	0.4 - 0.9	0.0199669	0.0609378	1	508		0.73	0.5 - 1.1	0.166905	0.264746	4	156		1.9	1.0 - 3.6	0.0670121	0.220249	8	86
ACTL6A		0.72	0.5 - 1.1	0.130266	0.161571	2	485		0.72	0.5 - 1.1	0.169341	0.223923	3	340		1.8	0.9 - 3.4	0.0791594	0.264219	6	48		0.77	0.5 - 1.2	0.219098	0.259224	2	485		0.73	0.5 - 1.1	0.140713	0.190376	2	485		0.66	0.4 - 1.2	0.18211	0.274472	8	50		0.58	0.3 - 1.2	0.127518	0.260364	2	285
GABPB1		1.3	0.9 - 1.9	0.142678	0.175603	5	304		1.5	0.9 - 2.5	0.105286	0.161979	8	98		1.7	0.8 - 3.4	0.141821	0.319596	8	24		1.4	1.0 - 2.0	0.0577553	0.120011	5	304		1.3	0.9 - 1.9	0.114929	0.170539	5	304		1.5	0.9 - 2.5	0.1185	0.220986	8	50		1.4	0.7 - 2.8	0.405244	0.442146	8	73
TUFT1		0.76	0.5 - 1.1	0.149666	0.182799	6	243		1.3	0.8 - 2.1	0.342086	0.377474	8	98		1.8	1.0 - 3.3	0.0675688	0.250795	6	49		1.6	1.0 - 2.4	0.0514877	0.111325	8	122		1.6	1.0 - 2.4	0.04212	0.0894241	8	122		1.3	0.8 - 2.0	0.259353	0.348719	6	100		1.4	0.7 - 2.8	0.406903	0.442146	8	72
FOXC1	1	1.4	0.9 - 2.1	0.160921	0.195055	8	122		0.82	0.5 - 1.3	0.41508	0.431252	6	195		0.57	0.3 - 1.1	0.100184	0.303962	2	96		0.74	0.5 - 1.1	0.109904	0.172399	5	303
SLC5A6		1.3	0.9 - 2.1	0.17544	0.211056	8	122		0.69	0.4 - 1.2	0.17116	0.224472	7	147		1.7	0.9 - 3.4	0.107716	0.312544	7	36		0.82	0.6 - 1.2	0.299582	0.332869	6	242		1.7	1.1 - 2.6	0.0207542	0.0609378	8	122		2	1.2 - 3.3	0.00983172	0.071238	8	50		1.5	0.6 - 3.8	0.337613	0.412306	2	285
POLE		0.78	0.5 - 1.1	0.177607	0.212068	4	364		0.59	0.4 - 0.9	0.0227813	0.0560182	5	244		1.7	0.7 - 4.0	0.253839	0.372783	2	96		1.2	0.8 - 1.8	0.425758	0.436765	3	425		0.86	0.6 - 1.2	0.414814	0.433669	4	364		1.3	0.8 - 2.2	0.265254	0.348719	3	174		0.48	0.2 - 0.9	0.0344983	0.190431	5	179
QSOX2		1.3	0.9 - 2.0	0.201339	0.238624	8	122		1.4	0.8 - 2.3	0.24432	0.296146	8	98		0.62	0.3 - 1.2	0.172664	0.345329	2	96		0.8	0.5 - 1.2	0.323548	0.349782	2	485		1.3	0.9 - 1.9	0.10717	0.170539	6	242		1.3	0.8 - 1.9	0.315309	0.372853	5	125		2	1.0 - 3.7	0.039712	0.191628	7	107
RBM14		0.79	0.5 - 1.1	0.212984	0.247663	3	424		1.7	1.1 - 2.6	0.0226357	0.0560182	6	195		0.78	0.4 - 1.5	0.458008	0.482114	3	85		1.3	0.9 - 2.0	0.204587	0.247655	8	122		1.5	1.0 - 2.1	0.0391292	0.0857117	6	243		1.6	1.0 - 2.7	0.0473508	0.128126	8	50		1.5	0.8 - 2.9	0.215944	0.324992	5	179
CCL2		1.3	0.9 - 1.9	0.213435	0.247663	4	364		1.8	1.1 - 3.0	0.0241299	0.0567763	8	98		0.38	0.2 - 0.8	0.0103217	0.195985	6	48		0.86	0.6 - 1.2	0.425846	0.436765	6	243		1.5	1.0 - 2.3	0.0622973	0.116548	8	122		1.4	0.9 - 2.2	0.127767	0.233636	5	125		1.9	0.9 - 3.8	0.0820659	0.220249	8	72
RBBP5		0.79	0.5 - 1.1	0.21361	0.247663	3	424		1.3	0.8 - 2.2	0.260753	0.309041	8	98		1.6	0.9 - 3.0	0.123259	0.314867	6	48		1.3	0.9 - 1.9	0.183628	0.233178	5	303		1.5	1.0 - 2.2	0.0333823	0.0755206	5	303		1.5	0.9 - 2.5	0.0899428	0.188062	8	50		1.8	0.9 - 3.6	0.0751051	0.220249	5	179
SLC7A11		1.3	0.9 - 1.9	0.220511	0.253825	2	382		1.2	0.7 - 2.0	0.498365	0.504673	8	99		1.5	0.8 - 2.9	0.235441	0.372573	3	76		1.2	0.8 - 1.8	0.340159	0.362836	2	382		0.8	0.5 - 1.2	0.283589	0.323432	1	425		0.72	0.4 - 1.2	0.218427	0.310752	1	202		0.57	0.2 - 1.9	0.357418	0.415003	9	45
SCIN		1.3	0.9 - 1.8	0.228729	0.261405	3	361		1.2	0.8 - 2.0	0.358036	0.387066	3	291		1.6	0.8 - 2.9	0.157184	0.336913	5	53		1.3	0.9 - 1.9	0.14633	0.205375	3	361		1.3	0.9 - 1.9	0.168582	0.220042	3	361		1.3	0.9 - 2.1	0.196809	0.290929	4	136		1.7	0.8 - 3.6	0.17471	0.297025	9	52
FXYD3		0.79	0.5 - 1.2	0.232509	0.26384	3	424		1.4	0.9 - 2.1	0.182726	0.233772	5	244		0.68	0.3 - 1.4	0.277419	0.379376	2	96		1.3	0.9 - 2.1	0.200293	0.246664	8	123		1.2	0.8 - 1.9	0.405331	0.42699	8	123		1.1	0.7 - 1.8	0.599084	0.603457	7	75		1.6	0.8 - 3.2	0.22677	0.324992	8	72
QSOX1		0.81	0.6 - 1.2	0.26162	0.294783	4	364		0.69	0.4 - 1.1	0.104352	0.161979	4	292		1.9	1.0 - 3.6	0.0371509	0.201116	7	36		1.4	0.9 - 2.2	0.187329	0.236005	2	485		1.4	0.9 - 2.3	0.107083	0.170539	2	485		1.6	1.0 - 2.5	0.0768889	0.168811	8	51		0.72	0.4 - 1.4	0.347592	0.415003	6	143
CDKN1A		0.8	0.5 - 1.2	0.272228	0.30459	3	424		0.8	0.5 - 1.3	0.403626	0.422092	7	146		0.56	0.3 - 1.1	0.0958431	0.303962	4	72		1.4	0.9 - 2.1	0.180137	0.230575	8	122		1.7	1.1 - 2.7	0.0204753	0.0609378	8	122		1.4	0.7 - 2.5	0.312401	0.372853	2	199		2	1.0 - 4.0	0.043047	0.191628	8	72
FOXA2		1.2	0.8 - 1.8	0.287973	0.318108	6	209		1.3	0.8 - 2.1	0.252606	0.301619	6	170		1.5	0.8 - 3.0	0.209413	0.36028	7	31		1.4	1.0 - 2.1	0.0720238	0.130952	6	209		1.7	1.1 - 2.5	0.00767491	0.0441307	6	209		1.6	1.0 - 2.6	0.0394877	0.113527	7	67		1.6	0.8 - 3.2	0.146627	0.277186	7	100
CTGF		1.3	0.8 - 2.1	0.288285	0.318108	2	485		1.3	0.8 - 2.0	0.320274	0.359676	7	148		2.2	1.0 - 5.1	0.0577929	0.249943	3	84		1.4	0.9 - 2.3	0.165035	0.224222	2	485		2.1	1.3 - 3.5	0.00294963	0.0239441	2	485		2.4	1.4 - 3.9	0.00090521	0.0208198	4	149		1.3	0.7 - 2.5	0.49066	0.501564	7	107
CTPS		1.2	0.8 - 1.8	0.291114	0.319029	7	182		0.82	0.5 - 1.4	0.477177	0.489413	2	389		0.63	0.3 - 1.3	0.227779	0.371884	7	36		0.81	0.5 - 1.3	0.33996	0.362836	2	485		1.2	0.9 - 1.8	0.265821	0.308263	6	243		1.2	0.7 - 1.8	0.52279	0.538395	5	125		0.62	0.3 - 1.3	0.200237	0.314008	2	286
FTH1P11		0.82	0.6 - 1.2	0.293993	0.319277	5	304		0.66	0.4 - 1.0	0.0695026	0.119574	5	244		1.8	0.9 - 3.6	0.106901	0.312544	8	24		1.4	0.9 - 2.3	0.163356	0.224222	2	487		1.7	1.0 - 2.6	0.0304942	0.0719586	8	124		2.1	1.1 - 4.1	0.03216	0.100582	2	199		1.5	0.8 - 3.1	0.22767	0.324992	8	75
CMTM8		0.8	0.5 - 1.2	0.295332	0.319277	7	182		1.5	0.9 - 2.4	0.103575	0.161979	4	292		0.62	0.3 - 1.3	0.185396	0.353135	2	96		1.3	0.9 - 1.8	0.235026	0.270533	4	364		1.3	0.8 - 2.0	0.347307	0.374441	2	485		1.4	0.9 - 2.2	0.160768	0.26349	4	150		1.6	0.8 - 3.4	0.170059	0.297025	8	72
FAM189B		0.82	0.5 - 1.3	0.35409	0.380231	2	485		1.1	0.7 - 1.8	0.583589	0.583589	4	292		2	1.0 - 4.0	0.0609709	0.249943	8	24		1.4	0.9 - 2.0	0.130963	0.191296	7	182		1.3	0.9 - 1.9	0.21176	0.258609	7	182		1.3	0.8 - 2.0	0.291679	0.357785	7	75		0.72	0.3 - 1.5	0.395058	0.436144	2	285
CD276		0.85	0.6 - 1.2	0.375568	0.400606	5	303		0.67	0.4 - 1.0	0.0801106	0.133518	5	243		2.1	1.1 - 4.2	0.0351481	0.201116	4	72		1.5	0.9 - 2.4	0.115256	0.175628	2	485		1.7	1.1 - 2.6	0.0128677	0.0517823	3	425		2.2	1.3 - 3.6	0.00184616	0.025477	4	149		0.73	0.4 - 1.4	0.357093	0.415003	6	143
ANGPTL4		1.2	0.8 - 1.8	0.378388	0.400941	8	162		0.64	0.4 - 1.2	0.140396	0.194191	1	426		1.7	0.7 - 4.0	0.242272	0.372573	2	96		0.82	0.6 - 1.2	0.302906	0.334241	4	378		1.3	0.9 - 1.9	0.195098	0.244759	8	162		1.4	0.9 - 2.1	0.162295	0.26349	6	112		0.66	0.3 - 1.6	0.357865	0.415003	1	317
CLDN7		0.84	0.6 - 1.2	0.381227	0.401291	3	424		0.73	0.5 - 1.2	0.185556	0.233772	3	340		3.3	1.7 - 6.3	0.000322482	0.0257986	8	24		1.4	1.0 - 2.2	0.082689	0.143807	7	182		1.5	1.0 - 2.1	0.0403065	0.086911	6	243		1.8	1.2 - 2.8	0.00859516	0.0683771	7	76		0.46	0.2 - 0.9	0.0246634	0.190431	2	286
CHEK2		1.2	0.8 - 1.7	0.408546	0.427238	5	288		0.79	0.5 - 1.3	0.354838	0.387066	1	378		0.76	0.4 - 1.5	0.407917	0.44967	3	81		0.81	0.5 - 1.4	0.420889	0.436765	9	96		0.64	0.4 - 1.0	0.0485915	0.100084	1	480		0.52	0.3 - 0.9	0.0287453	0.100582	1	221		0.65	0.3 - 1.2	0.185224	0.300717	3	207
POLA2		1.2	0.8 - 1.7	0.41734	0.4336	5	303		1.3	0.8 - 2.2	0.268187	0.313762	8	98		1.5	0.8 - 2.9	0.208863	0.36028	4	72		1.2	0.9 - 1.8	0.246159	0.279329	5	303		0.89	0.6 - 1.3	0.562924	0.567033	7	183		1.3	0.7 - 2.3	0.41558	0.451575	2	199		0.58	0.3 - 1.2	0.127363	0.260364	2	285
CYR61		1.2	0.8 - 1.8	0.423811	0.437482	3	424		1.4	0.9 - 2.1	0.174597	0.227118	6	195		0.58	0.2 - 1.4	0.219472	0.365786	8	24		1.2	0.8 - 1.8	0.360335	0.381812	3	424		1.6	1.1 - 2.3	0.0176125	0.0607631	5	305		1.6	1.0 - 2.6	0.0457773	0.128105	4	149		3.1	0.9 - 10.1	0.0619715	0.220249	2	285
MYC	1	0.84	0.6 - 1.3	0.431698	0.442767	2	486		1.3	0.8 - 2.1	0.381256	0.408758	3	340		0.61	0.3 - 1.4	0.256289	0.372783	8	24		1.1	0.8 - 1.7	0.471386	0.47435	4	364
ASNS		1.1	0.8 - 1.6	0.48924	0.498588	6	242		1.3	0.8 - 2.0	0.295986	0.337964	7	147		0.69	0.3 - 1.7	0.407105	0.44967	8	24		1.2	0.8 - 1.7	0.448102	0.456665	6	242		1.3	0.9 - 1.9	0.108828	0.170539	6	242		1.5	1.0 - 2.4	0.0700035	0.163737	7	75		1.4	0.7 - 2.6	0.35488	0.415003	5	179
KCNN4		1.1	0.7 - 1.8	0.535613	0.542392	8	122		0.82	0.5 - 1.3	0.402302	0.422092	4	292		0.5	0.3 - 0.9	0.0292863	0.195985	3	84		0.71	0.5 - 1.1	0.0892379	0.14873	4	364		1.2	0.8 - 1.8	0.484706	0.491834	8	122		1.4	0.8 - 2.5	0.271016	0.348719	2	199		0.69	0.3 - 1.4	0.327872	0.407625	2	285
GATAD2B		0.89	0.6 - 1.4	0.614886	0.618753	8	122		1.3	0.8 - 2.0	0.290513	0.334403	6	195		2	1.1 - 3.8	0.0280599	0.195985	6	48		1.3	0.9 - 1.9	0.203187	0.247655	4	364		1.5	1.0 - 2.2	0.0376768	0.0838612	4	364		1.5	1.0 - 2.4	0.0793192	0.171032	4	149		2.2	1.0 - 4.6	0.0444828	0.191832	4	215
CHRAC1		1.1	0.7 - 1.6	0.639292	0.639292	7	182		1.2	0.7 - 1.8	0.535044	0.538409	4	293		1.4	0.7 - 2.8	0.318059	0.411354	7	36		1.1	0.8 - 1.7	0.580505	0.580505	3	424		1.2	0.8 - 1.8	0.363088	0.386357	7	182		1.1	0.7 - 1.8	0.556648	0.564834	5	125		0.81	0.4 - 1.5	0.522232	0.529912	4	214

## Sheet: PAM50
FOXA1
SFRP1
ACTR3B
ANLN
BAG1
BCL2
BIRC5
BLVRA
CCNB1
CCNE1
CDC20
CDC6
CDH3
CENPF
CEP55
CXXC5
EGFR
ERBB2
ESR1
EXO1
FGFR4
FOXC1
GPR160
GRB7
KIF2C
KRT14
KRT17
KRT5
MAPT
MDM2
MELK
MIA
MKI67
MLPH
MMP11
MYBL2
MYC
NAT1
NDC80
NUF2
ORC6
PGR
PHGDH
PTTG1
RRM2
SLC39A6
TMEM45B
TYMS
UBE2C
UBE2T
